# Supplementary material for: Air Pollution and Neuropsychological Development: A Review of the Latest Evidence
Source: Oxford University Press journal article supplement (doi:10.1210/en.2015-1403), 2015-08-04
Supplement: en-15-1403.pdf [file en-15-1403.pdf]

Supplemental Table A. Quality assessment of the studies <sup>a</sup>.

| Author<br>(Year)                             | Study<br>design            | N     | Exposure assessment<br>(method)                                                                                                | Outcome assessment<br>(test)                                                                                   | Potential confounding variables<br>assessed <sup>b</sup>                                                                                                                                                                                      | Adjustment<br>for other<br>pollutants                          | Good quality<br>study |
|----------------------------------------------|----------------------------|-------|--------------------------------------------------------------------------------------------------------------------------------|----------------------------------------------------------------------------------------------------------------|-----------------------------------------------------------------------------------------------------------------------------------------------------------------------------------------------------------------------------------------------|----------------------------------------------------------------|-----------------------|
| <i>Cognitive and psychomotor development</i> |                            |       |                                                                                                                                |                                                                                                                |                                                                                                                                                                                                                                               |                                                                |                       |
| Calderón-<br>Garcidueñas et al.<br>(2012)    | Prospec-<br>tive<br>cohort | 20    | Selected areas below current<br>US standards                                                                                   | WISC-R                                                                                                         | Socioeconomic status and body mass<br>index                                                                                                                                                                                                   | No                                                             |                       |
| Clark et al.<br>(2012)                       | Cross-<br>sectional        | 960   | A combined emission-<br>dispersion and regression<br>modeling approach using the<br>King's College London<br>Emissions Toolkit | Suffolk reading scale<br>Child memory scale<br>"The search and the<br>memory task"<br>SDQ<br>Self-rated health | Maternal education, socioeconomic<br>position (employment status, housing<br>tenure, home crowding), ethnicity,<br>main language spoken at home,<br>parental support for school work,<br>classroom window glazing, long-<br>standing illness, | Aircraft and<br>road traffic<br>noise<br>exposure at<br>school |                       |
| Perera, Li et al.<br>(2012)                  | Birth<br>cohort            | 100   | Adducts in cord blood                                                                                                          | WPPSI                                                                                                          | Sex, gestational age, maternal age and<br>education, cord lead                                                                                                                                                                                | Cord lead                                                      | Yes                   |
| van Kempen et al.<br>(2012)                  | Cross-<br>sectional        | 553   | LUR model                                                                                                                      | Neurobehavioral<br>Evaluation System:<br>DMST<br>HECT<br>SAT<br>SDST<br>SRTT                                   | Age, sex, maternal education,<br>employment status, crowding, home<br>ownership, long-standing illness, main<br>language spoken at home, parental<br>support, type of window glazing at<br>school                                             | Road traffic<br>and aircraft<br>noise                          |                       |
| Chiu et al.<br>(2013)                        | Birth<br>cohort            | 174   | Spatial-temporal LUR model<br>based on children's residence<br>during their lifetime                                           | CPT                                                                                                            | Age, sex, child IQ, blood lead level,<br>maternal race and education, pre- and<br>postnatal tobacco smoke exposure,<br>community-level social stress                                                                                          | Blood lead                                                     | Yes                   |
| Abid et al.<br>(2014)                        | Cross-<br>sectional        | 1.257 | Urinary PAH metabolites                                                                                                        | Parental<br>report<br>(of ever-                                                                                | Age, sex, race/ethnicity, body mass<br>index, creatinine, socioeconomic<br>status, having a routine source of health                                                                                                                          | No                                                             |                       |

|                            |                 |       |                                                 |  |                                                                 |                                                                                                                                                                                                                                                                     |                        |     |
|----------------------------|-----------------|-------|-------------------------------------------------|--|-----------------------------------------------------------------|---------------------------------------------------------------------------------------------------------------------------------------------------------------------------------------------------------------------------------------------------------------------|------------------------|-----|
|                            |                 |       |                                                 |  | doctor<br>diagnosed<br>ADHD)                                    | care, birthweight, maternal age at birth,<br>treatment at a newborn care facility,<br>preschool attendance, postnatal<br>environmental tobacco smoke, hours<br>since last meal                                                                                      |                        |     |
| Guxens et al.<br>(2014)    | Birth<br>cohort | 9.482 | LUR models                                      |  | ASQ<br>BSID I-II-III<br>DDST II<br>MCDI<br>MIDI<br>MSCA         | Age, sex, season at birth date, maternal<br>age at delivery, education level,<br>country of birth, smoking during<br>pregnancy, parity and pre-pregnancy<br>body mass index, urbanicity at child's<br>birth address, evaluator and quality of<br>the cognitive test | No                     | Yes |
| Kim et al.<br>(2014)       | Birth<br>cohort | 520   | IDW modeling method                             |  | K-BSID-II                                                       | Sex, birth weight, gestational age,<br>maternal age, maternal education,<br>family income                                                                                                                                                                           | No                     | Yes |
| Lin et al.<br>(2014)       | Birth<br>cohort | 533   | Air-quality monitoring<br>stations in the towns |  | 2 neurobehavioral<br>development<br>parental-reported<br>scales | Gestational age, maternal education,<br>maternal nationality, breastfeeding,<br>parental nursery type, environmental<br>tobacco smoke exposure                                                                                                                      | No                     | Yes |
| Lovasi et al.<br>(2014)    | Birth<br>cohort | 277   | Personal monitoring (2<br>consecutive days)     |  | WPPSI-R                                                         | Sex, ethnicity, maternal education,<br>maternal IQ, environmental tobacco<br>smoke exposure in the home, quality of<br>the caretaking environment, household<br>English language exposure                                                                           | No                     | Yes |
| Tang, Lee et al.<br>(2014) | Birth<br>cohort | 308   | Adducts in cord blood                           |  | GDS                                                             | Sex, gestational age, maternal<br>education and age, cord lead, cord<br>mercury, environmental tobacco smoke                                                                                                                                                        | Cord lead &<br>mercury | Yes |
| Tang, Li et al.<br>(2014)  | Birth<br>cohort | 308   | PAH-DNA adducts<br>in cord blood                |  | GDS                                                             | Sex, gestational age, maternal<br>education, cord lead level, hours of<br>exposure/day                                                                                                                                                                              | Yes                    | Yes |

|                                    |                    |       |                                                                                                                   |                                                                                                      |                                                                                                                                                                                                                                                                                                                                                                             |                               |     |
|------------------------------------|--------------------|-------|-------------------------------------------------------------------------------------------------------------------|------------------------------------------------------------------------------------------------------|-----------------------------------------------------------------------------------------------------------------------------------------------------------------------------------------------------------------------------------------------------------------------------------------------------------------------------------------------------------------------------|-------------------------------|-----|
| Calderón-Garcidueñas et al. (2015) | Cross-sectional    | 50    | Subjects residing in high-pollution areas                                                                         | WISC-R                                                                                               | Age, sex, weight, body mass index                                                                                                                                                                                                                                                                                                                                           | No                            |     |
| Harris et al. (2015)               | Birth cohort       | 1.109 | Spatiotemporal LUR models                                                                                         | KBIT-2, WRAML2 (visual memory index), WRAMA (visual-motor subtest)                                   | Age, sex, gestational age, birth weight, breastfeeding duration, mothers' IQ and age, parental's education, parity, marital/cohabitation status, race/ethnicity, smoking status, exposure to secondhand smoke during pregnancy, alcohol consumption during pregnancy, annual household income, ownership of a gas stove, neighborhood socioeconomic status, seasonal trends | Blood lead (mother and child) | Yes |
| Jedrychowski et al. (2015)         | Birth cohort       | 170   | DNA adducts in cord blood                                                                                         | WISC-R                                                                                               | Sex, parity, maternal intelligence, maternal education, breastfeeding practice, environmental tobacco smoke during prenatal and postnatal periods, postnatal indoor PAH exposure                                                                                                                                                                                            | No                            | Yes |
| Kicinski et al. (2015)             | Cross-sectional    | 606   | Distance-weighted traffic density<br>Trans,trans-muconic acid in urine (as a proxy-biomarker of traffic exposure) | Neurobehavioral Evaluation System: Continuous performance test, Digit span test, Finger tapping test | Age, sex, maternal education, smoking, passive smoking, socioeconomic status, time of the day, day of the week                                                                                                                                                                                                                                                              | Blood lead                    |     |
| Sunyer et al. (2015)               | Prospective cohort | 2.715 | The average of the two 1-week measures adjusted for temporal variability                                          | ANT N-back task                                                                                      | Age, sex, gestational age and weight, parental education, occupation, marital status, neighborhood socioeconomic status, family origin, breastfeeding, smoking during pregnancy, environmental tobacco smoke at home,                                                                                                                                                       | Traffic noise                 | Yes |

|                                                       |              |                                          |                                                                  |                             |                                                                                                                                                                                                                                                                       |                                                |     |
|-------------------------------------------------------|--------------|------------------------------------------|------------------------------------------------------------------|-----------------------------|-----------------------------------------------------------------------------------------------------------------------------------------------------------------------------------------------------------------------------------------------------------------------|------------------------------------------------|-----|
|                                                       |              |                                          |                                                                  |                             | commuting mode, use of computer games, air pollution exposure at home                                                                                                                                                                                                 |                                                |     |
| <i>Neurobehavior</i><br>Perera, Tang et al.<br>(2012) | Birth cohort | 253                                      | Personal air monitoring Adducts in cord blood and maternal blood | CBCL                        | Gestational age, maternal intelligence, maternal education, quality of the proximal caretaking environment, season of monitoring, environmental tobacco smoke exposure during pregnancy, maternal prenatal demoralization, postnatal exposure to PAHs                 | No                                             | Yes |
| Becerra et al.<br>(2013)                              | Case-control | 83.229<br>7.594 cases<br>75.635 controls | LUR model surfaces                                               | DSM-IV-R                    | Sex, birth year, gestational age, maternal age, maternal place of birth, race/ethnicity, education, type of birth, parity, insurance type                                                                                                                             | Yes<br>(inclusion of all pollutants evaluated) | Yes |
| Jung et al.<br>(2013)                                 | Birth cohort | 49.073                                   | IDW modeling method                                              | ICD-9-CM                    | Sex, gestational age (preterm & full-term), socioeconomic status, comorbidities related to ASD (anxiety, bipolar disorder, depressive disorder, intellectual disabilities, obsessive-compulsive disorder, phobic disorder)                                            | Yes<br>(inclusion of all pollutants evaluated) | Yes |
| Newman et al.<br>(2013)                               | Birth cohort | 576                                      | LUR methodology                                                  | BASC-2                      | Parents' education, race/ethnicity, duration of breastfeeding, child care attendance during first year of life, smoking during pregnancy, cigarette exposure during 1 <sup>st</sup> year of life, lead exposure at home, cotinine, household income, insurance status | No                                             | Yes |
| Roberts et al.<br>(2013)                              | Birth cohort | 22.426                                   | U.S. EPA air pollution prediction models                         | Parental report<br>ADI-R to | Sex, maternal age at birth, maternal parents' education, family income, spouse/partner's education, tract                                                                                                                                                             | Yes<br>(inclusion of all pollutants)           | Yes |

|                      |                 |                                  |                                                        |                                                                                        |                                                                                                                                                                                                                                                                                                                                                                                                                                |            |     |
|----------------------|-----------------|----------------------------------|--------------------------------------------------------|----------------------------------------------------------------------------------------|--------------------------------------------------------------------------------------------------------------------------------------------------------------------------------------------------------------------------------------------------------------------------------------------------------------------------------------------------------------------------------------------------------------------------------|------------|-----|
|                      |                 |                                  |                                                        | 50 randomly selected cases                                                             | median income, tract percent college educated, smoking during pregnancy, year of birth, air pollution prediction model year                                                                                                                                                                                                                                                                                                    | evaluated) |     |
| Volk et al. (2013)   | Case-control    | 524<br>279 cases<br>245 controls | CALINE4 line-source air quality dispersion model       | ADI-R<br>ADOS<br>Mullen scales of early learning.<br>Vineland adaptive behavior scales | Sex, child's ethnicity, parents' education, maternal age, smoking during pregnancy, population density                                                                                                                                                                                                                                                                                                                         | No         | Yes |
| Abid et al. (2014)   | Cross-sectional | 1.257                            | Urinary PAH metabolites                                | Parental report (of ever-doctor diagnosed ADHD)                                        | Age, sex, birthweight, race/ethnicity, maternal age at birth, body mass index, socioeconomic status, having a routine source of health care, treatment at a newborn care facility, preschool attendance, postnatal environmental tobacco smoke, creatinine, hours since last meal                                                                                                                                              | No         |     |
| Gong et al. (2014)   | Birth cohort    | 3.426                            | Dispersion modeling controlling for seasonal variation | A-TAC                                                                                  | Sex, birth weight, gestational age, parity, maternal age at birth, maternal smoking during pregnancy, maternal marital status, parental education, family disposable income during mother's pregnancy, child's first year of life, and the ninth year of life with adjustment for inflation and family size, area-based socioeconomic characteristics in the year of birth, chromosome abnormalities and neurological diseases | No         | Yes |
| Perera et al. (2014) | Birth cohort    | 250                              | Adducts in cord blood and maternal blood               | CBCL<br>CPRS                                                                           | Age, sex, child's ethnicity, gestational age, maternal intelligence, maternal                                                                                                                                                                                                                                                                                                                                                  | No         | Yes |

|                              |                              |                                        |                                                                  |                              |                                                                                                                                                                                                                                                                   |    |     |
|------------------------------|------------------------------|----------------------------------------|------------------------------------------------------------------|------------------------------|-------------------------------------------------------------------------------------------------------------------------------------------------------------------------------------------------------------------------------------------------------------------|----|-----|
|                              |                              |                                        |                                                                  |                              | education, maternal prenatal demoralization, maternal ADHD symptoms, postnatal PAH exposure (urinary PAH metabolites at ages 3& 5), prenatal environmental tobacco smoke exposure, home caretaking environment, heating season, child anxiety/depression at age 9 |    |     |
| Volk et al. (2014)           | Case-control                 | 407<br>251 cases<br>156 controls       | CALINE4 line-source air-quality dispersion model                 | ADI-R<br>ADOS                | Sex, child's ethnicity, maximum education level in the home, maternal age, home ownership and prenatal smoking                                                                                                                                                    | No | Yes |
| von Ehrenstein et al. (2014) | Birth cohort                 | 768                                    | Monthly average exposures during pregnancy                       | DSM-IV-R                     | Sex, birth year, maternal age, maternal race/ethnicity, place of birth, education, parity, type of insurance, paternal age and education, pregnancy complications, birth weight, type of birth                                                                    | No | Yes |
| Guxens et al. (2015)         | Birth/<br>Prospective cohort | 8.079                                  | LUR models                                                       | A-TAC<br>CAST<br>CBCL<br>SRS | Age, sex, maternal age, maternal education, country of birth, prenatal smoking, parity, pre-pregnancy body mass index, urbanicity at child's birth address                                                                                                        | No | Yes |
| Kalkbrenner et al. (2015)    | Case-control                 | 15.645<br>979 cases<br>14.666 controls | Geospatial interpolation method with refined temporal resolution | DSM-IV-R                     | Sex, gestational age, race/ethnicity, maternal education, maternal age, maternal tobacco use in pregnancy, state, year, season of birth, marital status, residential mobility during gestation, median household income, urbanization                             | No | Yes |
| Raz et al.                   | Nested                       | 1.767                                  | Spatiotemporal models                                            | ADOS                         | Sex, child's birth year, birth month,                                                                                                                                                                                                                             | No | Yes |

|                          |              |                                  |            |                        |                                                                                                                                                                                                                                                                          |    |     |
|--------------------------|--------------|----------------------------------|------------|------------------------|--------------------------------------------------------------------------------------------------------------------------------------------------------------------------------------------------------------------------------------------------------------------------|----|-----|
| (2015)                   | case-control | 245 cases<br>1.522 controls      |            | Maternal report<br>SRS | premature birth, birth weight, paternal age at birth, paternal education, maternal grandparents' education, median census tract income in the birth year, gestational diabetes, preeclampsia, smoking during pregnancy, state, marital status, median census house value |    |     |
| Talbott et al.<br>(2015) | Case-control | 430<br>211 cases<br>219 controls | LUR models | ADOS<br>SCQ            | Maternal age, maternal education, maternal race, smoking during pregnancy                                                                                                                                                                                                | No | Yes |

---

EPA, Environmental Protection Agency; IDW, Inverse distance weighting; LUR, Land Use Regression.

ADI-R, Autism Diagnostic Interview-Revised; ADOS, Autism Diagnostic Observation Schedules; ANT, Attentional Network Test; ASQ, Ages and Stages Questionnaire; A-TAC, Autism-Tics, ADHD, and other Comorbidities inventory; BASC-2, Behavioral Assessment System for Children, Parent Rating Scale, 2<sup>nd</sup> Edition; BSID, Bayley Scales of Infant Development (I-first edition, II-second-edition, III-third edition); CBCL, Child Behavior Checklist; CPRS, Conners Parent Rating Scale-Revised; CPT, Conner's Continuous Performance Test; DDST II, Denver Development Screening Test II; DMST, the Digit Memory Span Test; DSM-IV-R, Diagnostic and Statistical Manual of Mental Disorders, 4th Edition, Text Revision; GDS, Gesell Developmental Scale; HECT, the Hand-Eye Coordination Test; ICD-9\_CM, International Classification of Diseases, 9<sup>th</sup> Revision, Clinical Modification; KBIT-2, Kaufman Brief Intelligence Test; K-BSID-II, Korean version of Bayley Scales of Infant Development II; MCDI, McArthur Communicative Development Inventory; MIDI, Minnesota Infant Development Inventory; MRI, Magnetic Resonance Imaging; MRS, Brain magnetic spectroscopy imaging; MSCA, McCarthy Scales of Children's Abilities; SCQ, Social Communication Questionnaire; SDQ, Strengths and Difficulties Questionnaire; SAT, the Switching Attention Test; SDST, the Symbol Digit Substitution Test; SRS, Social Responsiveness Scale; SRTT, the Simple Reaction Time Test; WISC-R, Wechsler Intelligence Scale for Children-Revised; WPPSI-R, Wechsler Preschool and Primary Scale of Intelligence-Revised; WRAML2, Wide Range Assessment of Memory and Learning; WRAVMA, Wide Range Assessment of Visual Motor Abilities.

ADHD, Attention deficit hyperactivity disorder; ASD, Autism spectrum disorder.

CO, Carbon monoxide; NO<sub>2</sub>, Nitrogen dioxide; O<sub>3</sub>, Ozone; PAHs, Polycyclic aromatic hydrocarbons; PM, Particulate matter; SO<sub>2</sub>, Sulfur dioxide.

<sup>a</sup> **Sufficient** - if most of the studies, including good quality studies, report an association, but evidence is not yet conclusive enough to conclude that there is a causal relationship, **limited** - several good quality, independent, studies report an association, but evidence is not yet conclusive enough, **inadequate** - if associations are reported in one or more studies, but insufficient quality, insufficient number of studies, lack of consistency between studies, and/or lack of statistical power preclude a conclusion regarding the presence or absence of an association, **insufficient** - if no associations are reported in one or more studies, but insufficient quality, insufficient number of studies, lack of consistency between studies, and/or lack of statistical power preclude a conclusion regarding the presence or absence of an association, **evidence for lack of association** - several good quality studies are consistent in not showing an association.

<sup>b</sup> These are confounders assessed or that have been considered, but not all of them are finally included in the adjusted models. Some studies included maternal non-smoking status in their eligibility criteria.

Supplemental Table B. Exposure assessment of included studies.

| Author<br>(Year)                                    | Exposure                                                                                                          |                                                                                                               |                                                                                                                                                                                                                                   |
|-----------------------------------------------------|-------------------------------------------------------------------------------------------------------------------|---------------------------------------------------------------------------------------------------------------|-----------------------------------------------------------------------------------------------------------------------------------------------------------------------------------------------------------------------------------|
|                                                     | Assessment                                                                                                        | Pollutant                                                                                                     | Levels of exposure                                                                                                                                                                                                                |
| <b><i>Cognitive and psychomotor development</i></b> |                                                                                                                   |                                                                                                               |                                                                                                                                                                                                                                   |
| Calderón-Garcidueñas et al. (2012)                  | Selected areas below current US standards                                                                         | CO, NO, O <sub>3</sub> , PM, SO <sub>2</sub> , lead:                                                          | Levels not provided                                                                                                                                                                                                               |
| Clark et al. (2012)                                 | A combined emission-dispersion and regression modeling approach using the King's College London Emissions Toolkit | NO <sub>2</sub> :                                                                                             | Mean (SD):<br>42,73 (10,60) µg/m <sup>3</sup>                                                                                                                                                                                     |
| Perera, Li et al. (2012)                            | Adducts in cord blood                                                                                             | PAH:                                                                                                          | Mean (SD):<br>0,32 (0,14) adducts/10 <sup>8</sup> nucleotides                                                                                                                                                                     |
| van Kempen et al. (2012)                            | LUR model                                                                                                         | NO <sub>2</sub> :                                                                                             | Mean (SD):<br>at home: 30,8 (5,5) µg/m <sup>3</sup><br>at school: 31 (5,1) µg/m <sup>3</sup>                                                                                                                                      |
| Chiu et al. (2013)                                  | Spatial-temporal LUR model based on children's residence during their lifetime                                    | BC:                                                                                                           | Mean: 0,63 µg/m <sup>3</sup> ;<br>IQR = 0,53-0,69 µg/m <sup>3</sup>                                                                                                                                                               |
| Abid et al. (2014)                                  | Urinary PAH metabolites                                                                                           | PAH:                                                                                                          | Median:<br>1-pyrene: 76,1 ng/L<br>1-naphthol: 1290,1 ng/L<br>2-naphthol: 2036,6 ng/L<br>2-fluorene: 254,3 ng/L<br>3-fluorene: 102,2 ng/L<br>1-phenanthrene: 128,7 ng/L<br>2-phenanthrene: 49,1 ng/L<br>3-phenanthrene: 106,0 ng/L |
| Guxens et al. (2014)                                | LUR models                                                                                                        | NO <sub>x</sub> :<br>NO <sub>2</sub> :<br>PM <sub>2.5</sub> :<br>PM <sub>2.5-10</sub> :<br>PM <sub>10</sub> : | Range of medians:<br>40 - 90 µg/m <sup>3</sup><br>11,5 - 43,9 µg/m <sup>3</sup><br>13,4 - 22,3 µg/m <sup>3</sup><br>9 - 20,5 µg/m <sup>3</sup><br>25 - 40,5 µg/m <sup>3</sup>                                                     |
| Kim et al. (2014)                                   | IDW modeling method                                                                                               | NO <sub>2</sub> :<br>PM <sub>10</sub> :                                                                       | Mean (range):<br>26,30 (13,08-45,12) ppb<br>53,19 (38,84-69,95) µg/m <sup>3</sup>                                                                                                                                                 |
| Lin et al. (2014)                                   | Air-quality monitoring stations in the towns                                                                      | CO:<br>NO <sub>2</sub> :<br>O <sub>3</sub> :<br>PM <sub>10</sub> :<br>SO <sub>2</sub> :                       | Mean (SD): (third trimester of pregnancy)<br>0,58 (0,13) ppm<br>18,33 (4,93) ppb<br>37,45 (10,18) ppb<br>55,88 (19,58) g/m <sup>3</sup><br>4,08 (2,51) ppb                                                                        |

|                                    |                                                                                                                   |                                         |                                                                                                                                                              |
|------------------------------------|-------------------------------------------------------------------------------------------------------------------|-----------------------------------------|--------------------------------------------------------------------------------------------------------------------------------------------------------------|
|                                    |                                                                                                                   | hydrocarbons:                           | 2,59 (0,17) ppm                                                                                                                                              |
| Lovasi et al. (2014)               | Personal monitoring (2 consecutive days) during the 3 <sup>rd</sup> trimester of pregnancy                        | PAH:                                    | Mean (SD):<br>3,5 (6,6) ng/m <sup>3</sup>                                                                                                                    |
| Tang, Lee et al. (2014)            | Adducts in cord blood                                                                                             | PAH:                                    | Mean (SD):<br>0,324 (0,139) adducts/<br>10 <sup>8</sup> nucleotides (I)<br>0,204 (0,081) adducts/<br>10 <sup>8</sup> nucleotides (II)                        |
| Tang, Li et al. (2014)             | PAH-DNA adducts in cord blood                                                                                     | PAH:                                    | Mean (SD):<br>0,330 (0,140) adducts/<br>10 <sup>8</sup> nucleotides (I)<br>0,200 (0,080) adducts/<br>10 <sup>8</sup> nucleotides (II)                        |
| Calderón-Garcidueñas et al. (2015) | Subjects residing in high-pollution areas                                                                         | O <sub>3</sub> :<br>PM <sub>2,5</sub> : | Range:<br>0,10 - 0,20 ppm<br>20 - 25 µg/m <sup>3</sup>                                                                                                       |
| Harris et al. (2015)               | Spatiotemporal LUR models                                                                                         | BC:<br>PM <sub>2,5</sub> :              | Mean (SD): (third trimester of pregnancy)<br>0,69 (0,23) µg/m <sup>3</sup><br>12,3 (2,6) µg/m <sup>3</sup>                                                   |
| Jedrychowski et al. (2015)         | DNA adducts in cord blood                                                                                         | PAH:                                    | Mean (95% CI):<br>0,23 (0,21-0,25) adducts/10 <sup>8</sup> nucleotides                                                                                       |
| Kicinski et al. (2015)             | Distance-weighted traffic density<br>Trans,trans-muconic acid in urine (as a proxy-biomarker of traffic exposure) | Traffic exposure:                       | Mean:<br>Residential: 245 km/day<br>School location: 232 km/day<br><br>105,3 µg/g                                                                            |
| Sunyer et al. (2015)               | The average of the two 1-week measures adjusted for temporal variability                                          | EC:<br>NO <sub>2</sub> :<br>UFP:        | Median (min-max): (outdoor values)<br>1,32 (0,58-3,89) µg/m <sup>3</sup><br>48,5 (25,9-84,5) µg/m <sup>3</sup><br>22.157 (11.939-51.146) no./cm <sup>3</sup> |
| <b>Neurobehavior</b>               |                                                                                                                   |                                         |                                                                                                                                                              |
| Perera, Tang et al. (2012)         | Personal air monitoring<br>Adducts in cord blood and maternal blood                                               | PAH:                                    | Mean (SD):<br>3,23 (2,76) ng/m <sup>3</sup>                                                                                                                  |
| Becerra et al.                     | LUR model surfaces                                                                                                | CO:                                     | IQR:<br>0,55 ppm                                                                                                                                             |

|                          |                                                                 |                                                                                                                                                                                                                 |                                                                                                                                                                                                                                                                                                                                                                                                                                                                                                                                                                                                               |
|--------------------------|-----------------------------------------------------------------|-----------------------------------------------------------------------------------------------------------------------------------------------------------------------------------------------------------------|---------------------------------------------------------------------------------------------------------------------------------------------------------------------------------------------------------------------------------------------------------------------------------------------------------------------------------------------------------------------------------------------------------------------------------------------------------------------------------------------------------------------------------------------------------------------------------------------------------------|
| (2013)                   |                                                                 | NO:<br>NO <sub>2</sub> :<br>O <sub>3</sub> :<br>PM <sub>2.5</sub> :<br>PM <sub>10</sub> :                                                                                                                       | 29,67 ppb<br>10,47 ppb<br>11,54 ppb<br>4,68 µg/m <sup>3</sup><br>8,25 µg/m <sup>3</sup>                                                                                                                                                                                                                                                                                                                                                                                                                                                                                                                       |
| Jung et al.<br>(2013)    | IDW modeling<br>method                                          | CO:<br>NO <sub>2</sub> :<br>O <sub>3</sub> :<br>PM <sub>10</sub> :<br>SO <sub>2</sub> :                                                                                                                         | (Min-Max)<br>0,55-0,7 ppm<br>13-25 ppb<br>95-120 ppb<br>35-75 µg/m <sup>3</sup><br>3-5 ppb                                                                                                                                                                                                                                                                                                                                                                                                                                                                                                                    |
| Newman et al.<br>(2013)  | LUR methodology                                                 | ECAT:                                                                                                                                                                                                           | Mean (SD):<br>0,4 (0,1) µg/m <sup>3</sup>                                                                                                                                                                                                                                                                                                                                                                                                                                                                                                                                                                     |
| Roberts et al.<br>(2013) | U.S. EPA air<br>pollution prediction<br>models                  | Antimony:<br>Arsenic:<br>Cadmium:<br>Chromium:<br>Diesel particulate:<br>Lead:<br>Manganese:<br>Mercury:<br>Methylene chloride:<br>Nickel:<br>Quinoline:<br>Styrene:<br>Trichloroethylenene:<br>Vinyl chloride: | Mean (SD):<br>3x10 <sup>-4</sup> (7x10 <sup>-4</sup> ) ug/m <sup>3</sup><br>2x10 <sup>-4</sup> (5x10 <sup>-4</sup> ) ug/m <sup>3</sup><br>2x10 <sup>-4</sup> (5x10 <sup>-4</sup> ) ug/m <sup>3</sup><br>0.001 (0.002) ug/m <sup>3</sup><br>1,9 (3,0) ug/m <sup>3</sup><br>0,005 (0,01) ug/m <sup>3</sup><br>0,004 (0,008) ug/m <sup>3</sup><br>0,002 (0,001) ug/m <sup>3</sup><br>0,4 (0,7) ug/m <sup>3</sup><br>0,005 (0,01) ug/m <sup>3</sup><br>2x10 <sup>-5</sup> (1x10 <sup>-4</sup> ) ug/m <sup>3</sup><br>0,06 (0,1) ug/m <sup>3</sup><br>0,3 (0,3) ug/m <sup>3</sup><br>0.02 (0,06) ug/m <sup>3</sup> |
| Volk et al.<br>(2013)    | CALINE4 line-<br>source air quality<br>dispersion model         | NO <sub>2</sub> :<br>O <sub>3</sub> :<br>PM <sub>2.5</sub> :<br>PM <sub>10</sub> :                                                                                                                              | Mean (SD): (all pregnancy)<br>17 (7,1) ppb<br>36 (8,1) ppb<br>14,4 (4,4) µg/m <sup>3</sup><br>26 (7,3) µg/m <sup>3</sup>                                                                                                                                                                                                                                                                                                                                                                                                                                                                                      |
| Abid et al.<br>(2014)    | Urinary PAH<br>metabolites                                      | PAH:                                                                                                                                                                                                            | Median:<br>1-pyrene: 76,1 ng/L<br>1-napthol: 1290,1 ng/L<br>2-napthol: 2036.6 ng/L<br>2-fluorene: 254,3 ng/L<br>3-fluorene: 102,2 ng/L<br>1-phenanthrene: 128,7 ng/L<br>2-phenanthrene: 49,1 ng/L<br>3-phenanthrene: 106,0 ng/L                                                                                                                                                                                                                                                                                                                                                                               |
| Gong et al.<br>(2014)    | Dispersion<br>modeling<br>controlling for<br>seasonal variation | NO <sub>x</sub> :<br><br>PM <sub>10</sub> :                                                                                                                                                                     | Median: (log-transformed)<br>9 µg/m <sup>3</sup> (pregnancy)<br>8 µg/m <sup>3</sup> (1 <sup>st</sup> year of life)<br>4 µg/m <sup>3</sup> (9 <sup>th</sup> year of life)<br>3 µg/m <sup>3</sup> (pregnancy)<br>3 µg/m <sup>3</sup> (1 <sup>st</sup> year of life)<br>2.5 µg/m <sup>3</sup> (9 <sup>th</sup> year of life)                                                                                                                                                                                                                                                                                     |

|                              |                                                                  |                                                                                                                                                |                                                                                                                                                                                                                 |
|------------------------------|------------------------------------------------------------------|------------------------------------------------------------------------------------------------------------------------------------------------|-----------------------------------------------------------------------------------------------------------------------------------------------------------------------------------------------------------------|
| Perera et al.<br>(2014)      | Adducts in cord blood and maternal blood                         | PAH:                                                                                                                                           | Mean (SD): (log-transformed)<br>Cord adduct: -1,67 (0,53)/10 <sup>8</sup> nucleotides<br>Maternal adduct: -1,73 (0,47) /10 <sup>8</sup> nucleotides                                                             |
| Volk et al.<br>(2014)        | CALINE4 line-source air-quality dispersion model                 | NO <sub>2</sub> , O <sub>3</sub> , PM <sub>2.5</sub> , PM <sub>10</sub> :                                                                      | Levels not provided                                                                                                                                                                                             |
| von Ehreinstei et al. (2014) | Monthly average exposures during pregnancy                       | 24 toxics including aromatic solvents, chlorinated solvents, lead, volatile organics, total PAHs, metals                                       | Range of means (SD):<br>0.05 (0.01) (Chloroform) – 4.00 (1.30) (Formaldehyde) ppvV<br>0.19 (0.16) (Hexavalent chromium) – 59.12 (51.69) (Copper) ng/m <sup>3</sup>                                              |
| Guxens et al.<br>(2015)      | LUR models                                                       | NO <sub>2</sub> ;<br>NO <sub>x</sub> ;<br>PM <sub>2.5</sub> ;<br>PM <sub>10</sub> ;<br>PM <sub>2.5-10</sub> ;<br>PM <sub>2.5</sub> absorbance: | Range of medians:<br>17,9-42,2 µg/m <sup>3</sup><br>35,25-75,36 µg/m <sup>3</sup><br>8,4-22,4 µg/m <sup>3</sup><br>17,22-41,26 µg/m <sup>3</sup><br>8,93-19,12 µg/m <sup>3</sup><br>1,27-2,55 µg/m <sup>3</sup> |
| Kalkbrenner et al.<br>(2015) | Geospatial interpolation method with refined temporal resolution | PM <sub>10</sub> :                                                                                                                             | Mean (SD): (range from 1994 to 2000) (third trimester of pregnancy)<br>22,9 (3,1) - 24,5 (3,2) µg/m <sup>3</sup>                                                                                                |
| Raz et al.<br>(2015)         | Spatiotemporal models                                            | PM <sub>2.5</sub> ;<br>PM <sub>10-2.5</sub> :                                                                                                  | Mean (SD):<br>14,6 (3,3) µg/m <sup>3</sup><br>9,9 (4,9) µg/m <sup>3</sup>                                                                                                                                       |
| Talbott et al.<br>(2015)     | LUR models                                                       | PM <sub>2.5</sub> :                                                                                                                            | Mean (SD): (entire pregnancy)<br>15.0 (1.9) µg/m <sup>3</sup> for cases<br>14.8 (1.8) µg/m <sup>3</sup> for controls                                                                                            |

EPA, Environmental Protection Agency; IDW, Inverse distance weighting; LUR, Land Use Regression.

BC, Black carbon; CO, Carbon monoxide; ECAT, Elemental carbon attributed to traffic; PM, Particulate matter; NO, Nitric oxide; NO<sub>x</sub>, Nitrogen oxides; NO<sub>2</sub>, Nitrogen dioxide; O<sub>3</sub>, Ozone; PAHs, Polycyclic aromatic hydrocarbons; SO<sub>2</sub>, Sulfur dioxide.
